# Supplementary material
Source: PubMed Central journal article supplement (PMC7443476)
Supplement: BPH-177-4261-s001.pdf [file BPH-177-4261-s001.pdf]

## SUPPORTING INFORMATION

Anderson *et. al.*

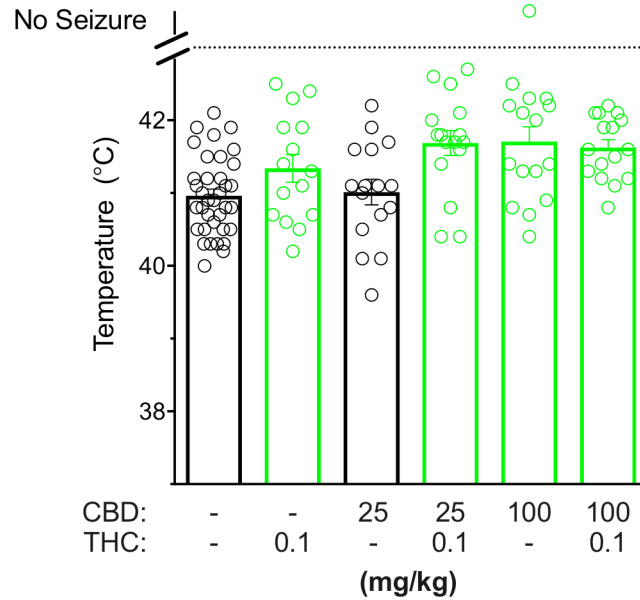

**Supporting Figure 1. Dose-response of CBD combination treatment with THC against hyperthermia-induced seizures in *Scn1a*<sup>+/-</sup> mice.** Temperature threshold of individual mice for GTCS induced by hyperthermia following acute treatment with THC (0.1 mg/kg) or CBD (25 or 100 mg/kg) administered individually or as a combination. CBD (25 mg/kg) had no effect on GTCS threshold. All other treatments resulted in significantly improved response to thermal seizure induction compared to vehicle (green, open symbols;  $p < 0.05$ ). The average temperatures of seizure induction are depicted by the bars and error bars represent SEM, with  $n = 15-36$  per treatment group.

**Supporting Table 1. Cannabinoid concentrations in plasma and brain samples**

|                              | Plasma Concentration<br>(ng/mL) | Brain Concentration<br>(ng/mL brain) | Brain:plasma<br>Ratio |
|------------------------------|---------------------------------|--------------------------------------|-----------------------|
| <b>CBD</b>                   |                                 |                                      |                       |
| 12 mg/kg                     | 402 ± 59                        | 196 ± 45                             | 1 : 2.1               |
| 12 mg/kg + 0.1 mg/kg THC     | 689 ± 104                       | 386 ± 125                            | 1 : 1.8               |
| 3500 mg/ kg chow             | 450 ± 94                        | 617 ± 18                             | 1.4 : 1               |
| 7000 mg/ kg chow             | 654 ± 49                        | 809 ± 153                            | 1.2 : 1               |
| 900 mg + 35 mg THC/ kg chow  | 421 ± 116                       | 201 ± 37                             | 1 : 2.1               |
| 3500 mg + 70 mg THC/ kg chow | 1703 ± 155                      | 1255 ± 146                           | 1 : 1.4               |
| <b>THC</b>                   |                                 |                                      |                       |
| 0.1 mg/kg                    | 3 ± 1                           | 4 ± 1                                | 1.3 : 1               |
| 0.1 mg/kg + 12 mg/kg CBD     | 9 ± 1                           | 5 ± 2                                | 1 : 1.8               |
| 70 mg/ kg chow               | 4 ± 1                           | 14 ± 2                               | 3.5 : 1               |
| 200 mg/ kg chow              | 18 ± 3                          | 27 ± 8                               | 1.5 : 1               |
| 35 mg + 900 mg CBD/ kg chow  | 6 ± 1                           | 11 ± 3                               | 1.8 : 1               |
| 70 mg+ 3000 mg CBD/ kg chow  | 16 ± 3                          | 23 ± 8                               | 1.4 : 1               |
